# Supplementary material for: New Species of Large-Spored Alternaria in Section Porri Associated with Compositae Plants in China
Source: MDPI journal article supplement (doi:10.3390/jof8060607), 2022-06-06
Supplement: s1 [file s1]

**Table S1.** The other *Altenraria* species associated with the Compositae plants from China analyzed by phylogeny.

| Section/<br>Monotypic lineage | Species                      | Strain       | Locality    | Substrate                             | GAPDH    | RPB2     |
|-------------------------------|------------------------------|--------------|-------------|---------------------------------------|----------|----------|
| Porri                         | <i>A. calendulae</i>         | YZU 161196   | China       | <i>Brachyactis ciliata</i> , leaf     | ON243980 | ON263326 |
|                               |                              | YZU 171080   | China       | <i>Calendula officinalis</i> , leaf   | ON243983 | ON263329 |
|                               | <i>A. tagetica</i>           | YZU 171201   | China       | <i>C. officinalis</i> , leaf          | ON243982 | ON263328 |
|                               | <i>A. zinniae</i>            | YZU 171353   | China       | <i>Zinnia elegans</i> , leaf          | ON243979 | ON263325 |
| Sonchi                        | <i>A. cinerariae</i>         | CBS 116495 R | USA         | <i>Ligularia</i> sp.                  | KC584109 | KC584389 |
|                               |                              | YZU 151063   | China       | <i>Carthamus tinctorius</i>           | -        | MH285937 |
|                               |                              | YZU 171105   | China       | <i>Pericallis hybrida</i>             | -        | MH285939 |
|                               |                              | YZU 171228   | China       | <i>Senecio cineraria</i>              | MH285947 | MH285940 |
|                               | <i>A. sonchi</i>             | YZU 171971   | China       | <i>Gynura divaricata</i>              | MH285948 | MH285941 |
|                               |                              | YZU 191293   | China       | <i>Tussilago farfara</i>              | -        | MN584905 |
|                               |                              | CBS 119675 R | Canada      | <i>Sonchus asper</i>                  | KC584142 | KC584433 |
|                               |                              | YZU 171131   | China       | <i>Sonchus oleraceus</i>              | -        | ON263330 |
| Teretispora                   | <i>A. leucanthemi</i>        | CBS 421.65 T | Netherlands | <i>Chrysanthemum maximum</i>          | KC584164 | KC584472 |
|                               |                              | CBS 422.65 R | USA         | <i>C. maximum</i>                     | KC584165 | KC584473 |
|                               |                              | YZU 161177   | China       | <i>Carthamus tinctorius</i> ,<br>leaf | ON243981 | ON263327 |
| Helianthiinficientes          | <i>A. helianthiinficiens</i> | CBS 208.86 T | USA         | <i>Helianthus annuus</i>              | KC584120 | KC584403 |
|                               |                              | CBS 117370 R | UK          | <i>H. annuus</i>                      | KC584119 | KC584402 |
|                               |                              | YZU 161169   | China       | <i>Cosmos bipinnatus</i> , leaf       | MF414167 | MH285936 |
| Monotypic lineage             | <i>A. argyranthemum</i>      | CBS 116530 T | New Zealand | <i>Argyranthemum</i> sp.              | KC584098 | KC584378 |
|                               |                              | YZU 171067   | China       | <i>Chrysanthemum coronarium</i>       | MG674139 | MG647617 |
|                               | <i>Cicatricea salina</i>     | CBS 302.84 T | North Sea   | <i>Cancer pagurus</i>                 | JN383467 | KC584450 |

Note: GenBank accession numbers in bold indicate the newly generated sequences. T: ex-type strain; R: representative strain.
