# Supplementary material for: New Species of Large-Spored Alternaria in Section Porri Associated with Compositae Plants in China
Source: MDPI journal article supplement (doi:10.3390/jof8060607), 2022-06-06
Supplement: s1 [file s1]

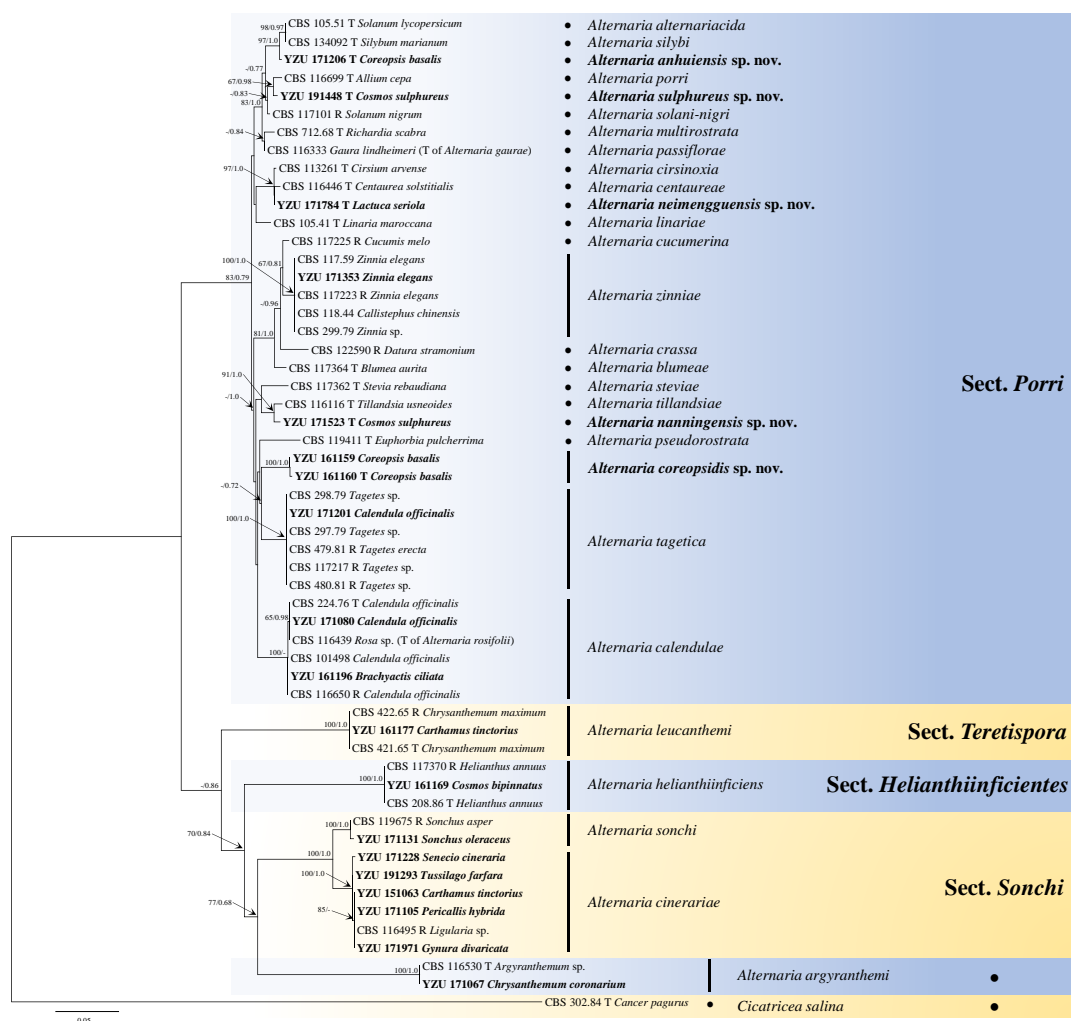

**Figure S1.** Phylogenetic tree of large-spored *Alternaria* from the Compositae family in China using a maximum likelihood (ML) analysis based on combined GAPDH and RPB2 gene sequences. The RAxML bootstrap support values > 60 % (ML) and Bayesian posterior probabilities > 0.6 (PP) are given at the nodes (ML/PP).
